# Supplementary material
Source: PubMed Central journal article supplement (PMC6824230)
Supplement: jamaoncol-6-51-s001.pdf [file jamaoncol-6-51-s001.pdf]

## Supplementary Online Content

Edeline J, Touchefeu Y, Guiu B, et al. Radioembolization plus chemotherapy for first-line treatment of locally advanced intrahepatic cholangiocarcinoma: a phase 2 clinical trial. *JAMA Oncol*. Published online October 31, 2019.  
doi:10.1001/jamaoncol.2019.3702

**eFigure.** Examples of Patients Downstaged to Surgery

**eTable 1.** Reasons for Unresectability of Patients Finally Resected

**eTable 2.** Cox Regression Analysis of Overall Survival According to Baseline Characteristics

This supplementary material has been provided by the authors to give readers additional information about their work.

## eFigure 1: Examples of Patients Downstaged to Surgery

73-year old male patient with a right hemiliver tumor in contact with the left portal vein (A). At 6 months, partial response by RECIST and CHOI criteria, and no contact with the left portal vein (B). He was treated with extended right hepatectomy, achieving R0 resection. He recurred after 1 year at the resection site, which was treated with stereotactic radiotherapy, but with recent progression of the same lesion. He is alive at 45 months following diagnosis and 32 months following surgery.

56-year old female patient with left hemiliver tumor involving left portal vein up to the portal trunk (C). At 6 months, stable disease by RECIST 1.1, partial response by CHOI, with thrombosis stabilized (D). She was treated with extended left hepatectomy. She recurred with one solitary tumor at 1 year following surgery in the right liver, treated with radiofrequency ablation. She is alive with no evidence of disease at 33 months following diagnosis, 25 months following surgery and 13 months following radiofrequency.

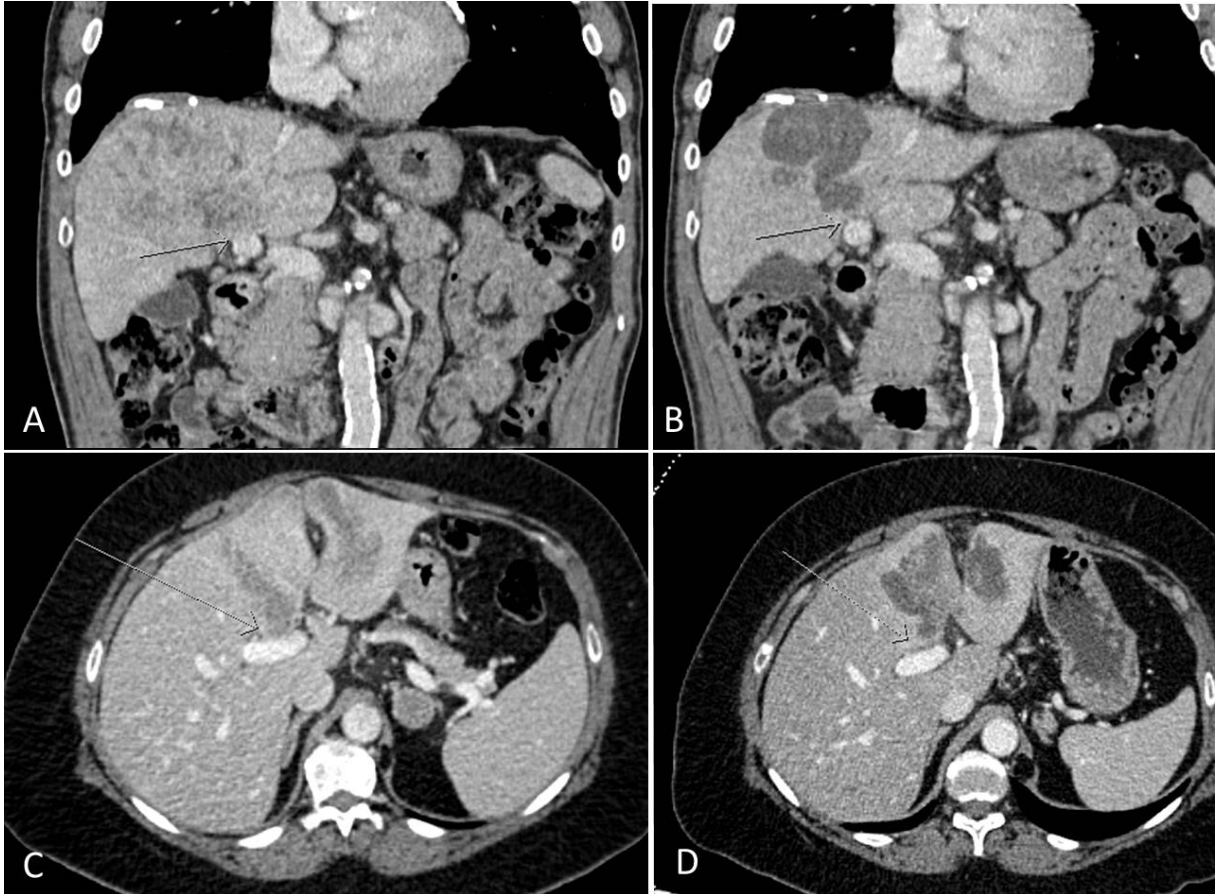

eTable 1: Reasons for Unresectability of Patients Finally Resected

| Patient number | Reason for initial unresectability                                                              | Outcomes following treatment | Surgical resection                                          |
|----------------|-------------------------------------------------------------------------------------------------|------------------------------|-------------------------------------------------------------|
| 4              | Central lesion in contact with both left and right portal branches                              | Left portal branch free      | Extended right hepatectomy                                  |
| 8              | Central lesion in contact with both left and right portal branches, left portal vein thrombosis | Right portal branch free     | Left hepatectomy extended to anterior sector                |
| 11             | Right liver lesion with contact with left portal branch                                         | Left portal branch free      | Right hepatectomy                                           |
| 18             | Left liver lesion with tumoral thrombus in the left branch up to the trunk                      | Necrosis of the thrombus     | Left hepatectomy, viable tumor in the branch but R0 surgery |
| 19             | Central lesion in contact with both left and right portal branches, left portal vein thrombosis | Right portal branch free     | Left hepatectomy extended to anterior sector                |
| 22             | Central lesion in contact with both left and right portal branches                              | Right portal branch free     | Left hepatectomy extended to anterior sector                |
| 26             | Involvement of 3 hepatic veins                                                                  | Left hepatic vein free       | Extended right hepatectomy                                  |
| 30             | Central lesion in contact with both left and right portal branches                              | Left hepatic branch free     | Right hepatectomy                                           |
| 41             | Involvement of 3 hepatic veins                                                                  | Left hepatic vein free       | Extended right hepatectomy                                  |

eTable 2: Cox Regression Analysis of Overall Survival According to Baseline Characteristics

|                                  | Univariable analysis |         | Multivariable (n=36) |         |
|----------------------------------|----------------------|---------|----------------------|---------|
|                                  | HR [95%]             | P value | HR [95%]             | P value |
| Age (by 5-years increment), n=41 | 0.94 [0.75 - 1.16]   | 0,549   |                      |         |
| Sex (male vs female), n=41       | 1.06 [0.45 - 2.49]   | 0,888   |                      |         |
| Cirrhosis, n=41                  | 1.82 [0.76 - 4.36]   | 0,179   |                      |         |
| PS>1, n=40                       | 1.85 [0.79 - 4.3]    | 0,155   |                      |         |
| Albumin (by 5UI increment), n=39 | 0.32 [0.19 - 0.54]   | <0.001  | 0.21 [0.11 - 0.43]   | < 0.001 |
| Prothrombin time, n=41           | 0.91 [0.79 - 1.04]   | 0,148   |                      |         |
| Total bilirubin, n=41            | 1.25 [0.92 - 1.71]   | 0,16    |                      |         |
| ALT, n=41                        | 0.9 [0.68 - 1.18]    | 0,439   |                      |         |
| AST, n=41                        | 1.14 [0.8 - 1.61]    | 0,474   |                      |         |
| PAL (by 10UI increment), n=41    | 1.08 [1.03 - 1.13]   | 0,002   |                      |         |

|                                            |                    |       |                     |       |
|--------------------------------------------|--------------------|-------|---------------------|-------|
| GGT (by 10UI increment), n=40              | 1.02 [1 - 1.04]    | 0,056 |                     |       |
| AFP> ULN, n=40                             | 2.31 [0.99 - 5.39] | 0,052 |                     |       |
| CA19.9> ULN, n=39                          | 1.78 [0.72 - 4.39] | 0,21  |                     |       |
| CEA> ULN, n=39                             | 3.27 [1.36 - 7.86] | 0,008 | 5.17 [1.82 - 14.69] | 0,002 |
| Previous surgery, n=41                     | 0.49 [0.11 - 2.11] | 0,336 |                     |       |
| Bilolateral tumor, n=41                    | 1.55 [0.67 - 3.6]  | 0,306 |                     |       |
| Pulmonary lesions, n=41                    | 1.5 [0.55 - 4.09]  | 0,423 |                     |       |
| Abdominal lymph nodes, n=41                | 2.33 [0.95 - 5.69] | 0,063 |                     |       |
| Liver hilar lymph nodes, n=41              | 1.84 [0.74 - 4.57] | 0,186 |                     |       |
| Other centers vs coordinating center, n=41 | 2.62 [1.1 - 6.29]  | 0,03  |                     |       |

PS: Performance Status; ALT: Alanin Transferase; AST: Aspartate Transferase; GT: Glutamyl Transferase; PAL: Alkalin Phosphatase; AFP: Alpha-feto Protein; CA: Carcino Antigen; CEA: Carcino-Embryonic Antigen.
